# Supplementary material
Source: Springer Nature journal article supplement (https://www.springermedizin.de/resource/supplementary/12875_2013_1192_MOESM5_ESM.pdf/9435566)

# Absolute risk for a chronic disease in female at onset of IA

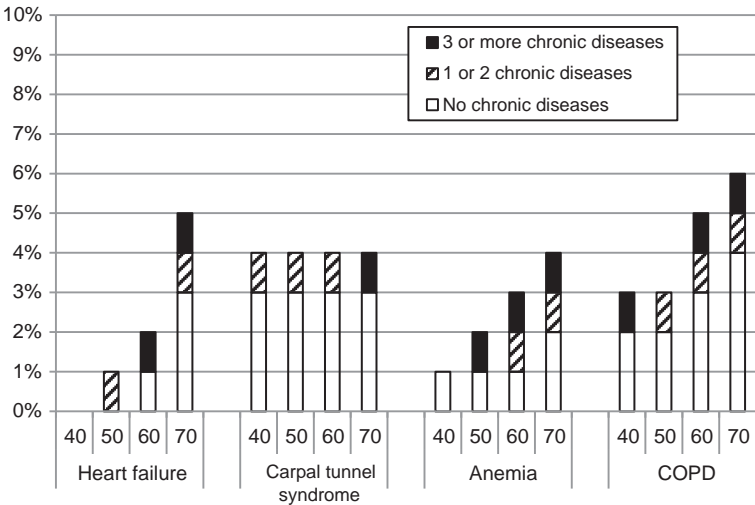

Supplement: MOESM5 [file 9435566]
